# Supplementary material for: The Mere Sight of Loved Ones Does Not Inhibit Psychophysiological Defense Mechanisms When Threatened
Source: Research Square preprint supplement (doi:10.21203/rs.3.rs-965841/v1), 2021-10-28
Supplement: Supplementary file 1 [file 2099a62ad99f04ff7ed191c3.xlsx]

## Sheet: Table 1 Bayes factors
				Context rating				Picture rating				Physiology
	Model	BFInclusion:		Threat	Valence	Arousal		Threat	Valence	Arousal		Startle	SCR
	Context			3.160*1014	3.16*1014	3.125*1011		∞	1.901*107	2.145*1014		2.137*107	27.927
	Face Category							6.143*108	5.106*1013	93125.272		0.07	0.066
	Day			1.544*106	0.081	511112.697		2.087*108	0.064	49555.602		1.476*1013	474.082
	Context × Face Category							0.337	0.381	0.432		0.051	0.049
	Context × Day			16.523	0.074	13.724		17.292	0.03	1.373		5.616	3.872
	Face Category × Day							0.292	0.106	0.354		0.018	0.067
	Context × Face Category × Day							0.026	0.001	0.024		0.002	0.006
	Note. Bayes factors (BFincl) of the selected models compared to all models without this factor for the different dependent measures
